# Supplementary material for: Using operando techniques to understand and design high performance and stable alkaline membrane fuel cells
Source: PubMed Central journal article supplement (PMC7366663; doi:10.1038/s41467-020-17370-7), 2020-07-16
Supplement: 41467_2020_17370_MOESM2_ESM.pdf [file 41467_2020_17370_MOESM2_ESM.pdf]

**Editorial Note:** This manuscript has been previously reviewed at another journal that is not operating a transparent peer review scheme. This document only contains reviewer comments and rebuttal letters for versions considered at *Nature Communications*.
